# Supplementary material for: Influence of hemicellulose and lignin on the effect of drying of cellulose and the subsequent enzymatic hydrolysis
Source: Royal Society of Chemistry journal article supplement (doi:10.1039/d5gc02029h), 2025-01-01
Supplement: d5gc02029h1.pdf [file d5gc02029h1.pdf]

## SUPPLEMENTARY

### **Influence of hemicellulose and lignin on the effect of drying of cellulose and the subsequent enzymatic hydrolysis**

Tian-Jie Ao <sup>a, b, c</sup>, Jie Wu <sup>b, c\*</sup>, Richard Chandra <sup>b, d\*</sup>, Huai-Yu Zhang <sup>c</sup>, Yu-Feng Yuan <sup>b</sup>,  
Yi-Ping Luo <sup>a</sup>, Dong Li <sup>a</sup>, Chen-Guang Liu <sup>c</sup>, Scott Renneckar <sup>c</sup>, Jack Saddler <sup>b</sup>

<sup>a</sup> Chengdu Institute of Biology, Chinese Academy of Sciences, Chengdu 610213, PR China

<sup>b</sup> Forest Product Biotechnology/Bioenergy Group, Department of Wood Science, Faculty of Forestry, University of British Columbia, 2424 Main Mall, Vancouver, BC, V6T 1Z4, Canada

<sup>c</sup> Advanced Renewable Materials Lab, Department of Wood Science, University of British Columbia, 2424 main mall, Vancouver, BC, V6T 1Z4, Canada

<sup>d</sup> Trinity Western University, 22500 University Dr, Langley, BC, V2Y 1Y1, Canada

<sup>e</sup> State Key Laboratory of Microbial Metabolism, Joint International Research Laboratory of Metabolic & Developmental Sciences, School of Life Sciences and Biotechnology, Shanghai Jiao Tong University, Shanghai 200240, China

\*Corresponding author

E-mails: adam.wu@ubc.ca; richard.chandra@twu.ca;

**Table S1.** The characteristics of EMAL lignin from starting and pretreated corn stover using GPC and NMR

|                                      | Molecular weight from |       |     | Functional group from 31P NMR (mmol/g) |                |           |               |            |
|--------------------------------------|-----------------------|-------|-----|----------------------------------------|----------------|-----------|---------------|------------|
|                                      | GPC                   |       |     | Aliphatic                              | Total Phenolic | Condensed | Non-condensed | Carboxylic |
|                                      | Mn                    | Mw    | Đ   |                                        |                |           |               |            |
|                                      | (kDa)                 | (kDa) |     | OH                                     | OH             | Phenolic  | Phenolic      | acid       |
| EMAL from starting corn<br>stover    | 4.9                   | 8.2   | 1.7 | 4.6                                    | 3.0            | 0.5       | 2.5           | 0.2        |
| EMAL from pretreated corn<br>stover  | 2.5                   | 7.2   | 2.9 | 3.1                                    | 2.9            | 0.8       | 2.1           | 0.3        |
| Softwood Kraft lignin <sup>[1]</sup> | 1.4                   | 12.7  | 9   | 1.4                                    | 2.1            | 1.1       | 1.0           | 0.3        |

## References

[1] J. Liu, J. Wu, Y. Lu, H. Zhang, Q. Hua, R. Bi, O. Rojas, S. Renneckar, S. Fan, Z. Xiao and J. Saddler, Bioresour. Technol., 2023, 367, 128276.
